# Supplementary material for: Inertia-activated cell sorting of immune-specifically labeled cells in a microfluidic device
Source: Royal Society of Chemistry journal article supplement (doi:10.1039/c4ra06296e), 2014-01-01
Supplement: c4ra06296e1.pdf [file c4ra06296e1.pdf]

**Supporting Information**

**Inertia-activated cell sorting of immune-specifically  
labeled cells in a microfluidic device**

**Joong Ho Shin,<sup>a</sup> Myung Gwon Lee,<sup>b</sup> Sungyoung Choi<sup>c</sup> and Je-Kyun Park<sup>a\*</sup>**

<sup>a</sup> Department of Bio and Brain Engineering, Korea Advanced Institute of Science and Technology (KAIST), 291 Daehak-ro, Yuseong-gu, Daejeon 305-701, Republic of Korea

<sup>b</sup> Intellectual Discovery Co., Ltd., 511 Samseong-ro, Gangnam-gu, Seoul 135-745, Republic of Korea

<sup>c</sup> Department of Biomedical Engineering, Kyung Hee University, 1732 Deogyong-daero, Gilheung-gu, Yongin-si, Gyeonggi-do 446-701, Republic of Korea

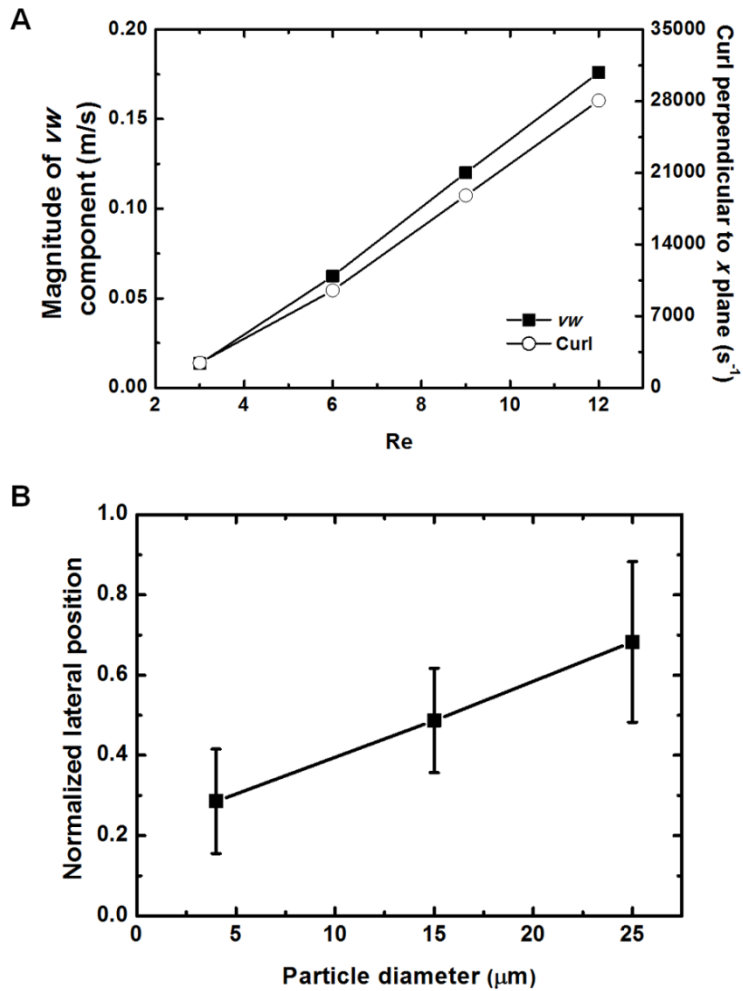

**Fig. S1** A) The magnitude of  $v_w$  (transverse velocity component) and the absolute value of maximum curl (rotation of the vortex) values at 30  $\mu m$  inward the entrance of the second contraction region plotted with respect to Re values. B) Normalized lateral positions versus particle diameter obtained by plotting the lateral positions of 4, 15 and 25  $\mu m$  beads at Re = 12. Linear fit results in an equation  $y = 0.21 + 0.0188x$ , which translates to 13.3  $\mu m$  difference in lateral position per 1  $\mu m$  difference in particle diameter

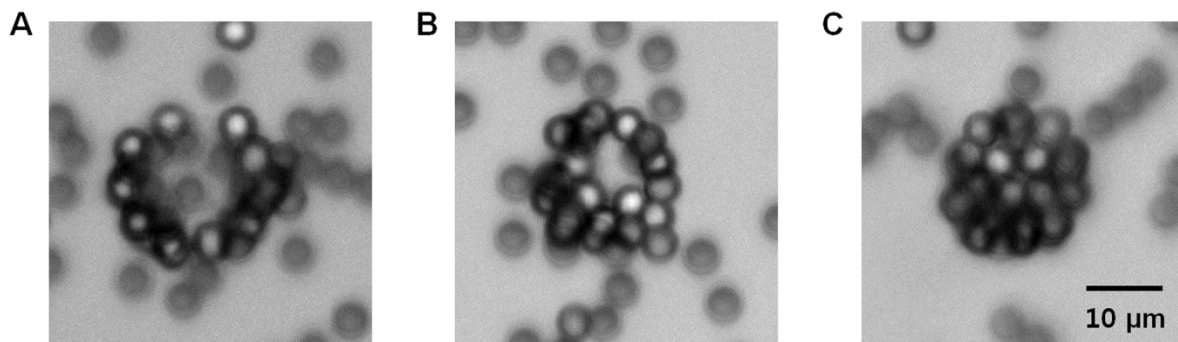

**Fig. S2** Pictures of A) poorly labeled MCF-7 cell, B) bead-covered MCF-7 cell showing uncovered spot, and C) well covered MCF-7 cell. All pictures were taken from the same incubation batch to show that there is variation in coverage.
